# Supplementary material for: Endogenous glucocorticoids and impaired insulin signaling are both required to stimulate muscle wasting under pathophysiological conditions in mice
Source: JCI journal article supplement (doi:10.1172/jci38770), 2009-09-14
Supplement: sd1 [file 1]

**A**

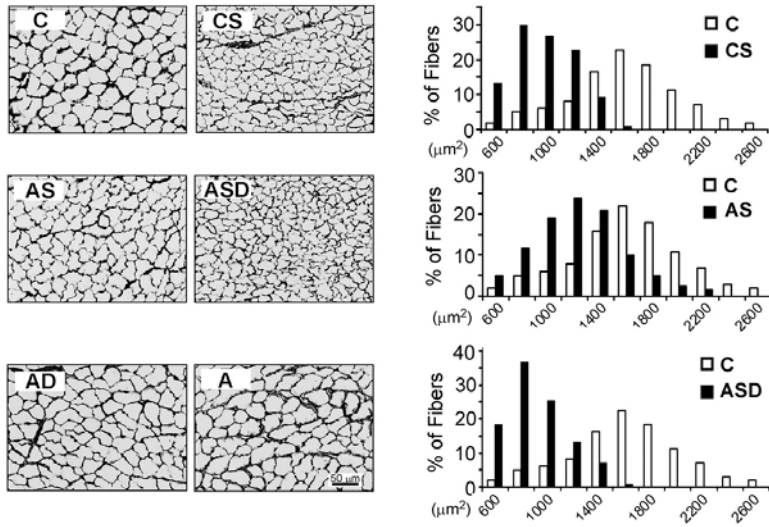

**B**

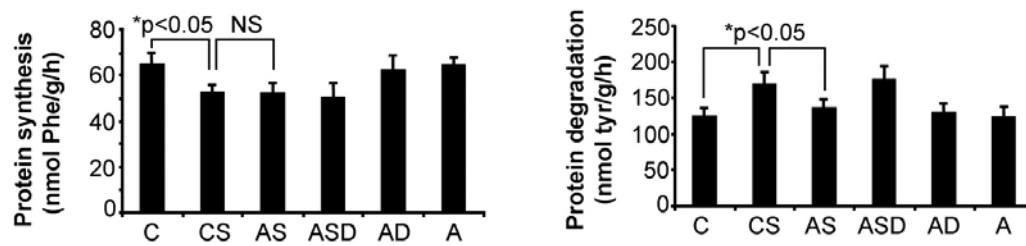

**C**

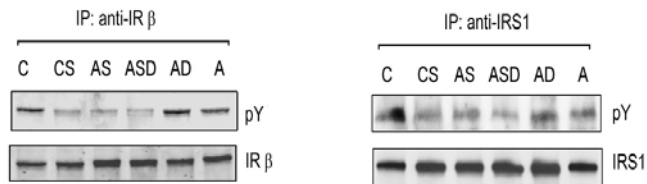

**A**

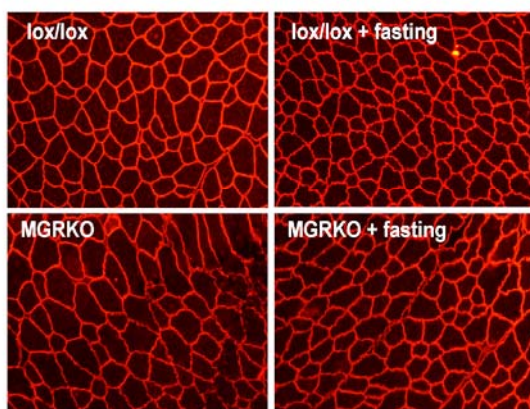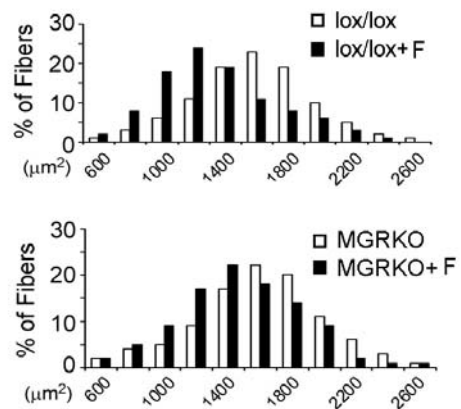

**B**

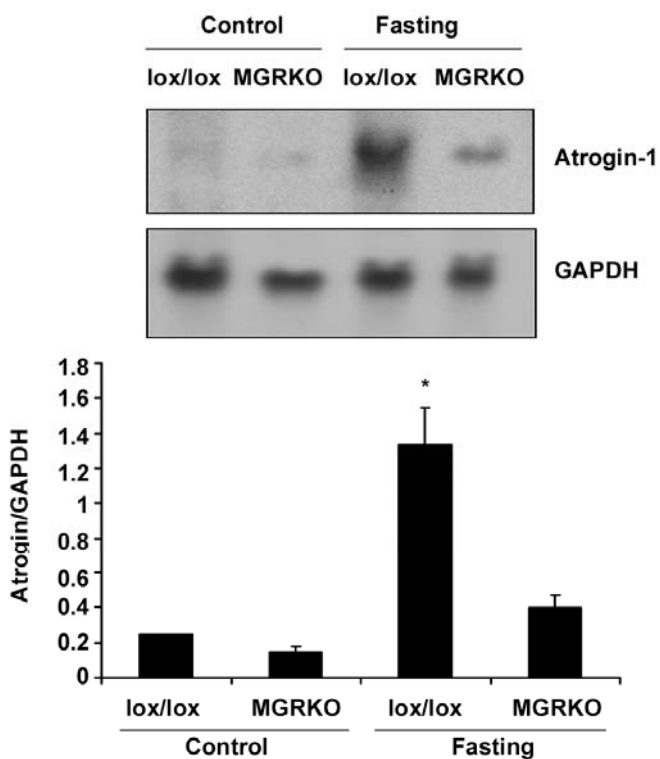

**C**

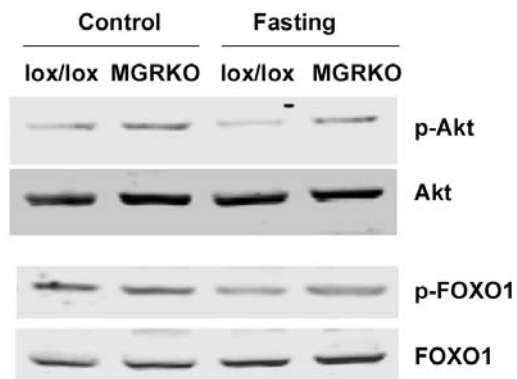

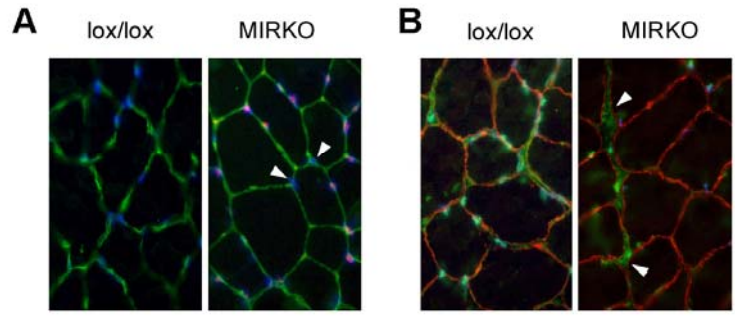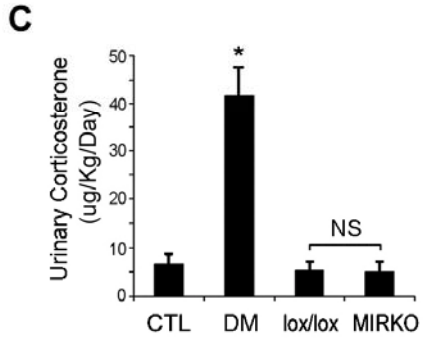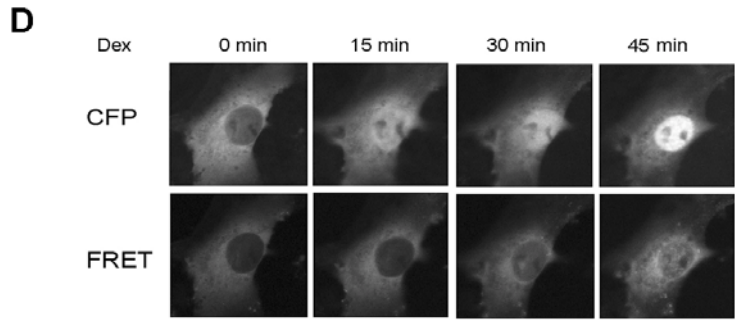

**A**

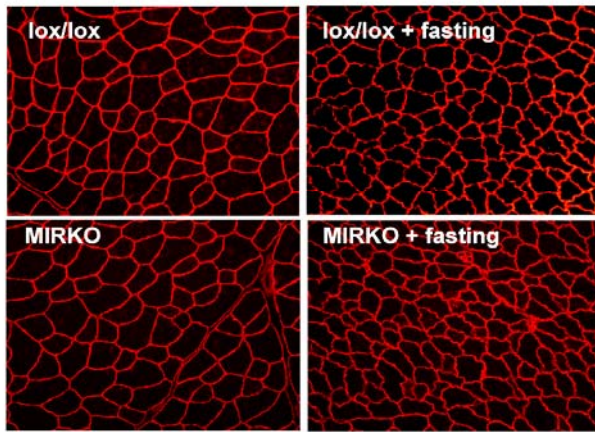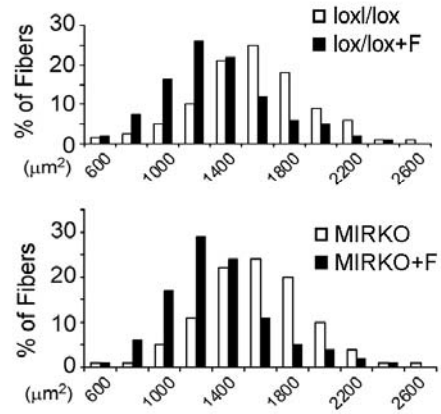

**B**

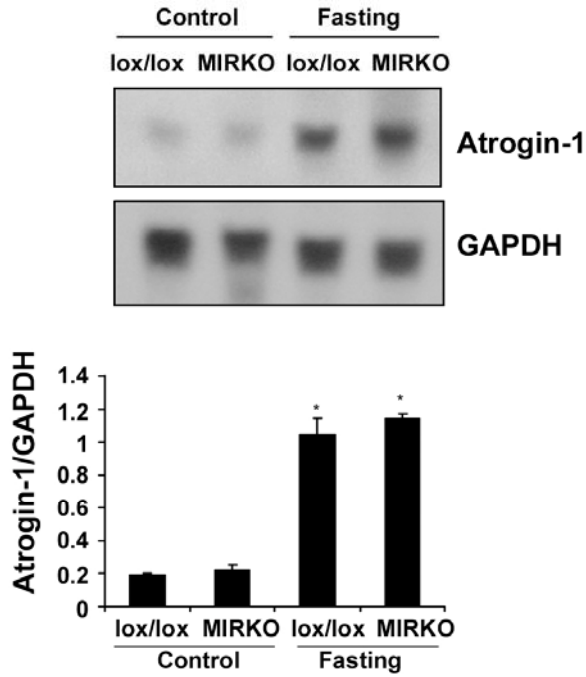

**C**

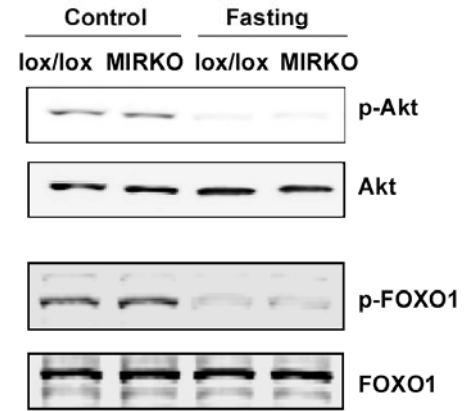

**Supplemental figure 1:** A: Acute diabetes induces muscle atrophy (CS vs C) as indicated by a left shift in the distribution of myofiber sizes. Adrenalectomy ameliorated diabetes-induced muscle atrophy (AS vs C). Adding DEX restored the diabetes-induced muscle atrophy in adrenalectomized mice (ASD vs C). B: Protein synthesis (Left panel) in muscles from control mice (C) was suppressed by acute diabetes (CS). Adrenalectomy did not eliminate the diabetes-induced in protein synthesis (AS). Adding DEX did not change muscle protein synthesis (ASD or AD) (\*,  $p < 0.05$ ;  $n = 6$  mice in each group). Right panel: the increase in protein breakdown in muscles of acutely diabetic mice (CS) was blocked by adrenalectomy (AS) and restored by DEX replacement (ASD). DEX (AD) or adrenalectomy (A) alone did not affect protein breakdown (\*,  $p < 0.05$ ;  $n = 6$ ). C: DEX ( $n = 3$ ) did not change tyrosine phosphorylation of either the insulin receptor (left panel) or IRS-1 (right panel).

**Supplemental figure 2:** MGRKO mice are resistant to fasting-induced muscle atrophy. A. comparison of the distribution of the cross sectional areas of myofibers in fasted and non fasted lox/lox, control and MGRKO mice. B. Atrogin-1/MAFbx mRNA values in muscles from lox/lox mice were higher in response to fasting compared to results in MGRKO mice. C. Fasting of lox/lox mice reduced p-Akt and p-FoxO1 levels in muscle more than in muscles of MGRKO mice ( $n = 5$  in each group;  $p < 0.05$ ).

**Supplemental figure 3:** A: By immunofluorescence analysis, the Cre recombinase (Red) was expressed in nuclei of myofibers from MIRKO mice but not in satellite cell nuclei (arrows). Green staining is for dystrophin; blue staining of nuclei is by DAPI. B. Insulin receptor expression (green staining) was markedly decreased in myofibers of

MIRKO mice; insulin receptors were expressed in satellite/vascular cells (arrows).

C . In control mice, acute diabetes (DM) markedly increased corticosterone production.

In MIRKO mice, defective insulin signaling in muscle did not stimulate corticosterone production (\*,  $p < 0.001$ ,  $n = 3$ ). D: A fluorescence resonance energy transfer (FRET)

analysis (lower panel) confirmed that GR and p85 of PI3K interact. DEX caused GR-CFP to translocate to the nucleus but abundant GR-CFP remained in the cytosol (upper panel). Cytosolic GR-CFP (donor) interacted with p85-YFP (recipient) resulting in an increase of FRET in the cytoplasm.

**Supplemental figure 4:** MIRKO mice develop muscle atrophy with fasting. A.

comparison of the distribution of cross sectional areas of myofibers with and without fasting of lox/lox, control and MIRKO mice. B. Atrogin-1/MAFbx mRNA values in

muscles from lox/lox and MIRKO increased to a similar degree when mice were fasted.

C. Fasting reduced p-Akt and p-FoxO1 levels in muscles of lox/lox and MIRKO mice to a similar degree ( $n = 5$  in each group;  $p < 0.05$ ).
